# Supplementary material for: Interplay among Gcn5, Sch9 and Mitochondria during Chronological Aging of Wine Yeast Is Dependent on Growth Conditions
Source: PubMed Central journal article supplement (PMC4319768; doi:10.1371/journal.pone.0117267), 2015-02-06

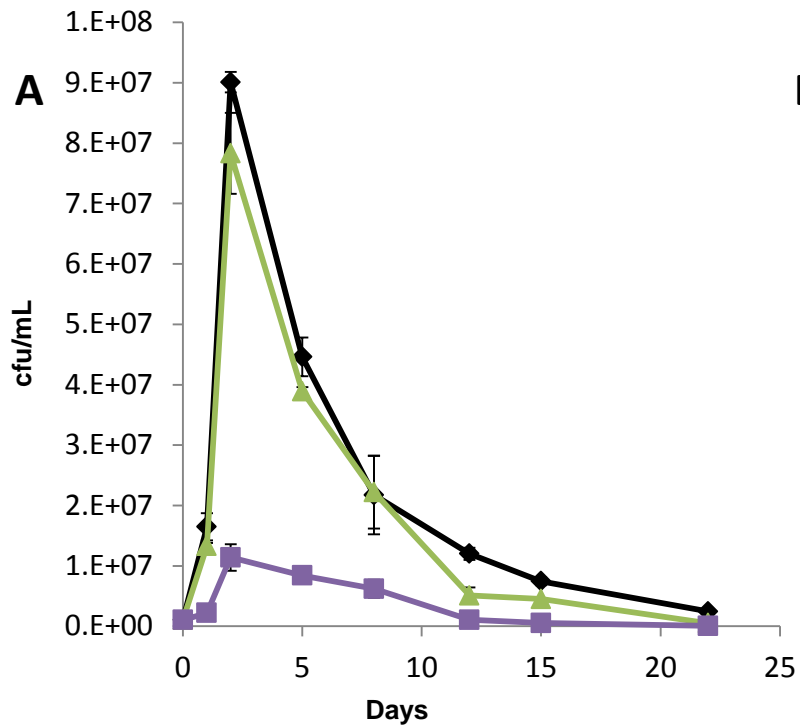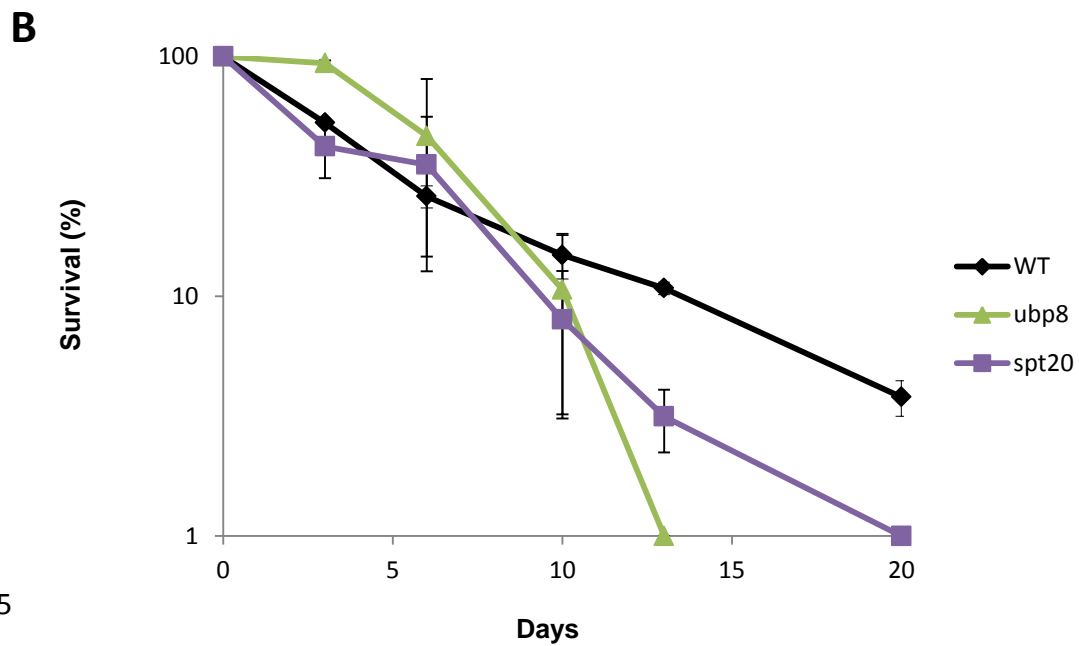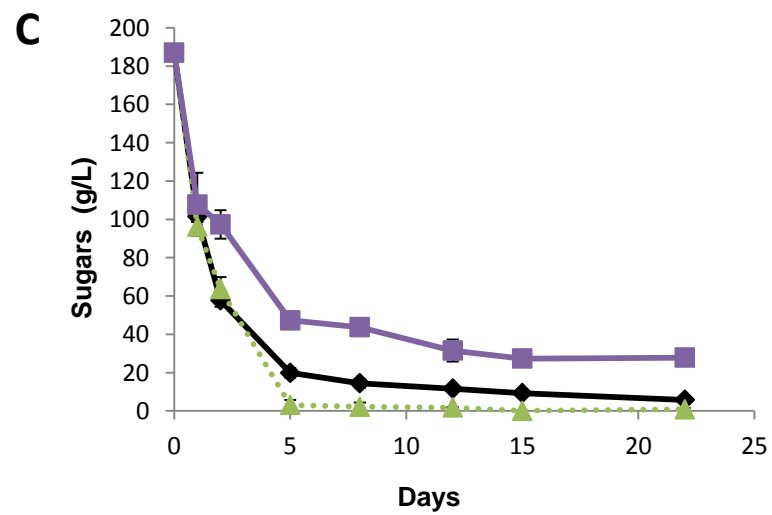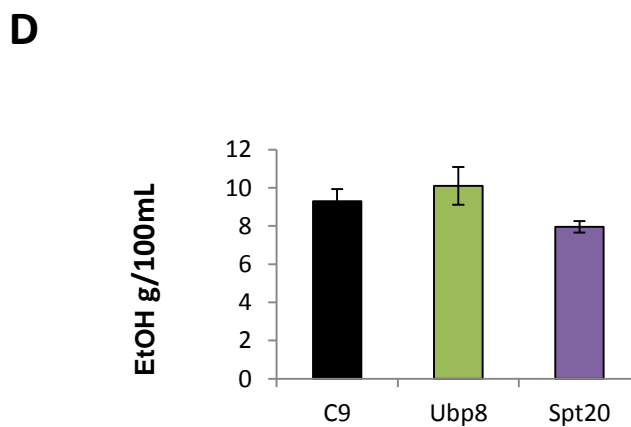

Supplement: pone.0117267.s001.pdf [file pone.0117267.s001.pdf]
